# Supplementary material for: The effect of a thin gold layer on graphene: a Raman spectroscopy study
Source: Royal Society of Chemistry journal article supplement (doi:10.1039/c4ra11270a), 2014-01-01
Supplement: c4ra11270a1.pdf [file c4ra11270a1.pdf]

Supplementary information

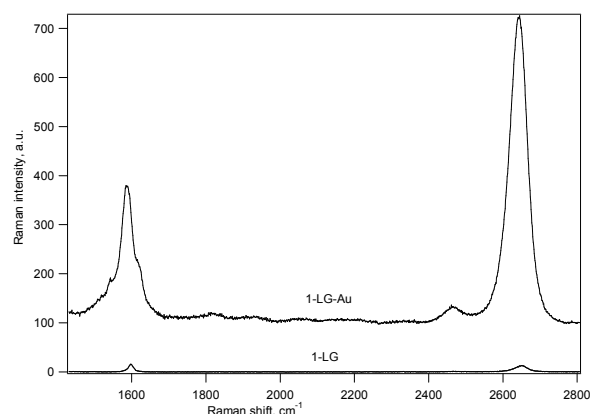

**SupFigure 1.** The Raman spectra of 1-LG and 1-LG-Au sample (with 15 nm of Au) on Si/SiO<sub>2</sub> substrate.

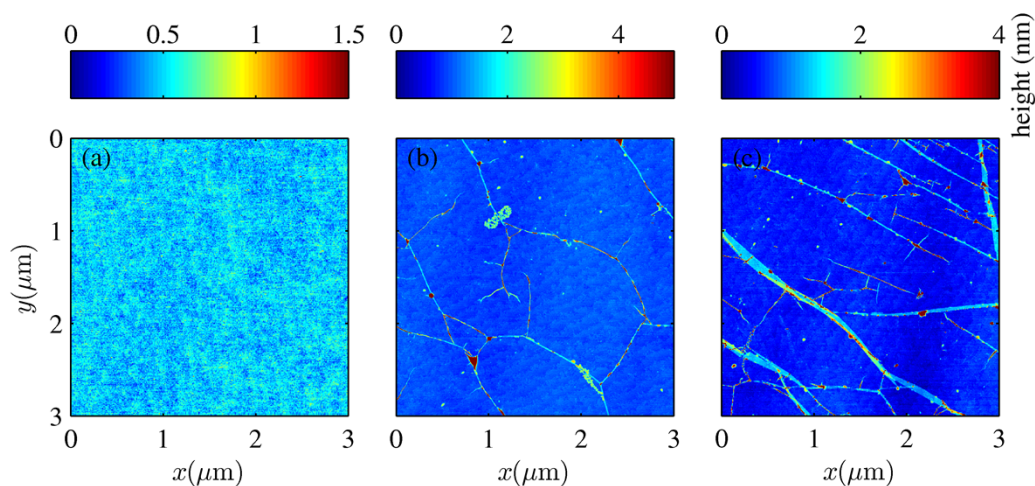

**SupFigure 2.** AFM image of a) sapphire <11-20> and b, c) sapphire <11-20> with graphene at two different places on the sample.

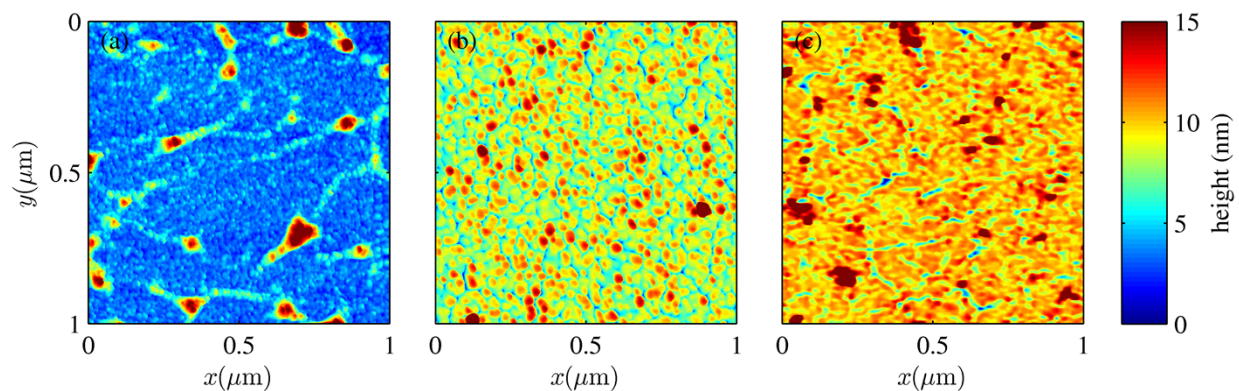

**SupFigure 3.** AFM image of graphene on sapphire  $\langle 11\text{-}20 \rangle$  covered by a) 5, b) 10 and c) 20 nm layer of Au. The size of the imaged area is  $1\mu\text{m}^2$ . The height scale bar is the same for all figures for easier comparison of the samples.
